# Supplementary material
Source: ML conference proceedings conference paper supplement (https://openreview.net/forum?id=8GFoOB7XB4)

Simulate  $p_\xi(x_1|x_2)$ ,    Sample  $z_r$     Fuse, Decode    Generate Interval    Predict (Point)

Encode

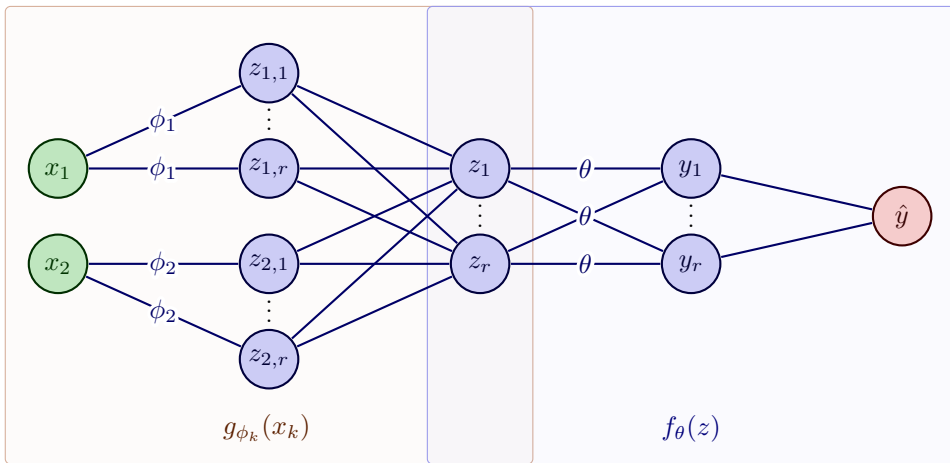

Supplement: supplementary_material [file attachment]
